# Supplementary material for: Lower pulmonary vein-to-left atrium volume ratio predicts poor rhythm outcome after atrial fibrillation catheter ablation
Source: Frontiers journal article supplement (doi:10.3389/fcvm.2022.934168), 2022-07-15
Supplement: Data_Sheet_1.pdf [file Data_Sheet_1.pdf]

## ***Supplementary Material***

**Supplementary Figure 1. Representative three-dimensional reconstructed LA images and boundary of LA and PV volume.**

**Supplementary Figure 2. Comparisons of the predictive value of AF recurrence between LA dimension and PV/LA%vol in the tertile groups according to the LA dimension in selected patients who underwent circumferential PV isolation alone.**

**Supplementary Table 1. Cox regression analysis for clinical recurrence after AFCA in selected patients who underwent PV isolation alone.**

**Supplementary Table 2. Associated SNPs in *PITX2* with PV/LA%vol in two different cohorts.**

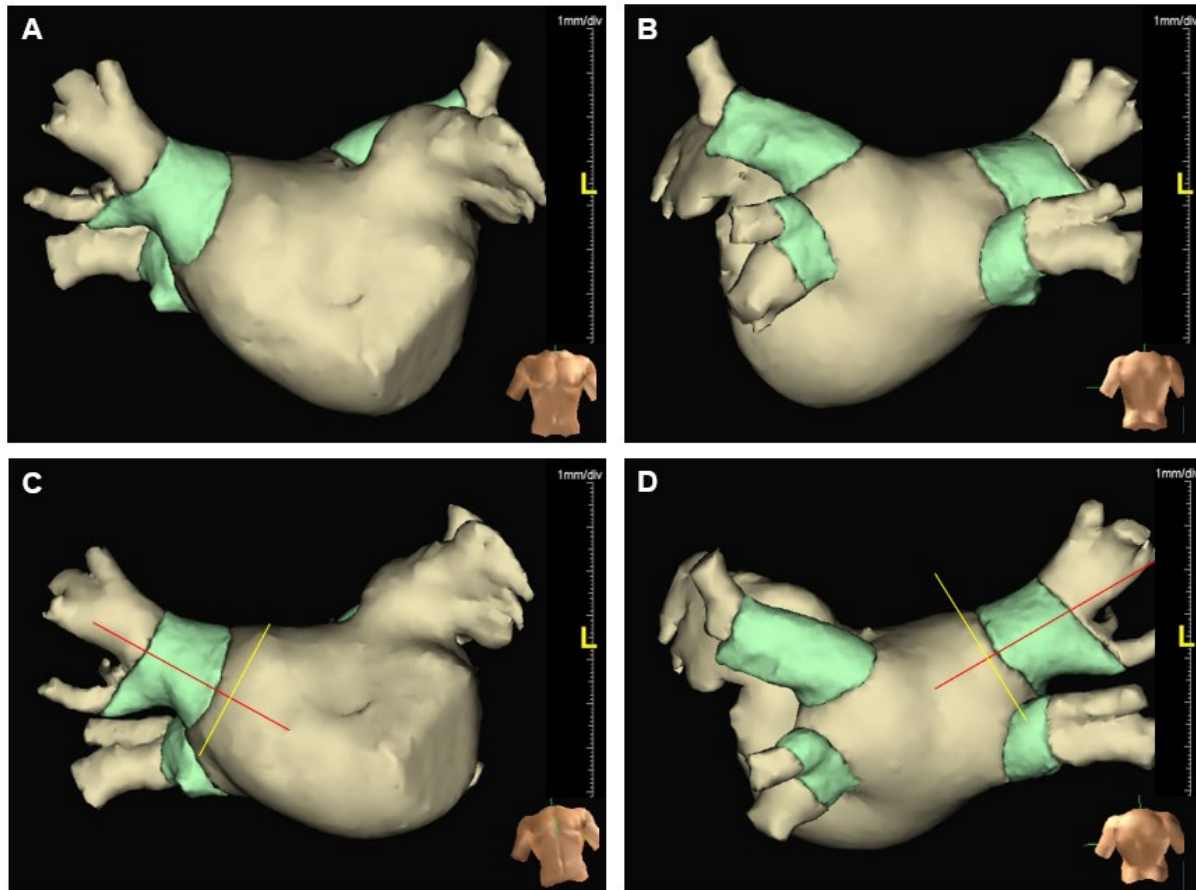

**Supplementary Figure 1. Representative three-dimensional reconstructed LA images and boundary of LA and PV volume.**

Three-dimensional reconstructed LA images in the AP (A) and PA views (B). The boundary of the PV was divided from the PV ostia to the primary tributaries with equal horizontal extension bilaterally in the AP (C) and PA views (D).

AP, anteroposterior; LA, left atrium or left atrial; PA, posteroanterior; PV, pulmonary vein.

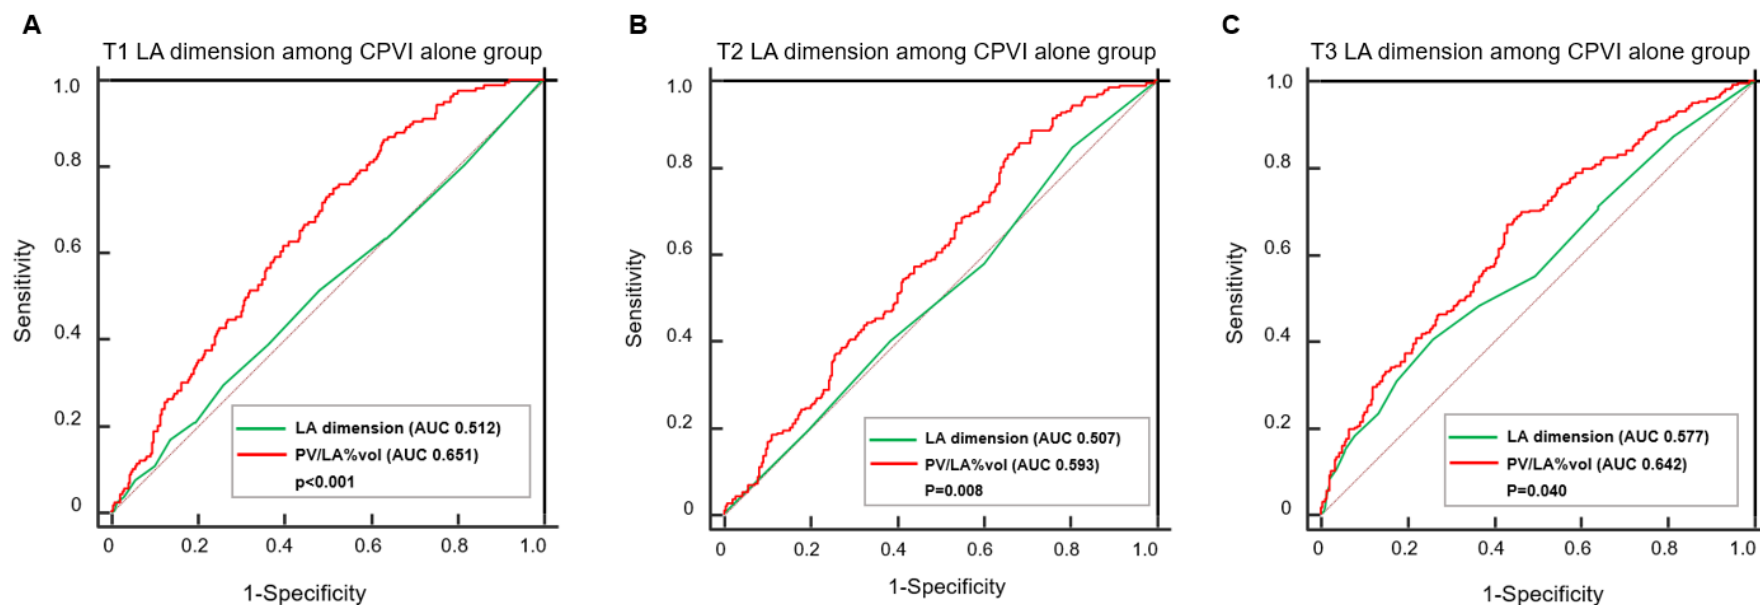

**Supplementary Figure 2. Comparisons of the predictive value of AF recurrence between LA dimension and PV/LA%vol in the tertile groups according to the LA dimension in selected patients who underwent circumferential PV isolation alone.**

Comparisons of AUCs between PV/LA%vol and LA dimension in the T1 (A), T2 (B), and T3 (C) LA dimension groups.

AF, atrial fibrillation; AUC, Area under the receiver operating characteristic curve; CPVI, circumferential pulmonary vein isolation; LA, left atrium or left atrial; PV/LA%vol, pulmonary vein to left atrium volume percent ratio.

**Supplementary Table 1.** Cox regression analysis for clinical recurrence after AFCA in selected patients who underwent PV isolation alone.

|                         | Univariate       |        | Multivariate     |        |
|-------------------------|------------------|--------|------------------|--------|
|                         | HR (95% CI)      | P      | HR (95% CI)      | P      |
| Persistent AF           | 1.42 (1.18–1.72) | <0.001 | 1.52 (1.18–1.95) | 0.001  |
| Female                  | 1.27 (1.06–1.51) | 0.009  | 1.49 (1.17–1.90) | 0.001  |
| Age                     | 1.00 (0.99–1.01) | 0.837  |                  |        |
| Body mass index         | 1.02 (0.99–1.04) | 0.219  |                  |        |
| Comorbidity             |                  |        |                  |        |
| Hypertension            | 1.15 (0.98–1.36) | 0.088  |                  |        |
| Diabetes                | 1.15 (0.92–1.44) | 0.212  |                  |        |
| Heart failure           | 1.33 (1.02–1.72) | 0.033  | 1.28 (0.87–1.89) | 0.206  |
| Vascular disease        | 0.75 (0.57–1.01) | 0.054  |                  |        |
| LV ejection fraction    | 0.99 (0.98–1.00) | 0.029  | 1.00 (0.98–1.01) | 0.765  |
| E/Em                    | 1.02 (1.00–1.04) | 0.076  |                  |        |
| Extra-PV foci           | 2.35 (1.74–3.17) | <0.001 | 2.22 (1.64–3.00) | <0.001 |
| PV/LA%vol               | 0.90 (0.84–0.97) | 0.003  | 0.90 (0.82–1.00) | 0.040  |
| Genetic study (n=1627)  |                  |        |                  |        |
| rs12646447 <sup>†</sup> | 0.96 (0.79–1.16) | 0.655  |                  |        |

<sup>†</sup> Univariate analysis was performed in 1627 out of 2219 patients who had data on genetic study.

AF, atrial fibrillation; AFCA, atrial fibrillation catheter ablation; CI, confidence interval; E/Em, ratio of the peak mitral flow velocity of the early rapid filling to the early diastolic velocity of the mitral annulus; LA, left atrium; LV, left ventricular; PV, pulmonary vein; PV/LA%vol, pulmonary vein to left atrium volume percent ratio.

**Supplementary Table 2.** Associated SNPs in *PITX2* with PV/LA%vol in two different cohorts.

| Chr      | SNP               | Position         | Closest gene        | Cohort 1<br>(n=1020) |                  |              | Cohort 2<br>(n=1131) |               |              |
|----------|-------------------|------------------|---------------------|----------------------|------------------|--------------|----------------------|---------------|--------------|
|          |                   |                  |                     | $\beta$              | 95% CI           | P            | $\beta$              | 95% CI        | P            |
| <b>4</b> | <b>rs12646447</b> | <b>110778170</b> | <b><i>PITX2</i></b> | <b>0.12</b>          | <b>0.02–0.23</b> | <b>0.020</b> | <b>0.17</b>          | <b>0–0.33</b> | <b>0.045</b> |
| 4        | rs10019689        | 110728713        | <i>PITX2</i>        | 0.12                 | 0.02–0.22        | 0.017        | NA                   | NA            | NA           |
| 4        | rs17042171        | 110787131        | <i>PITX2</i>        | 0.12                 | 0.02–0.23        | 0.020        | NA                   | NA            | NA           |
| 4        | rs2200733         | 110789013        | <i>PITX2</i>        | 0.12                 | 0.02–0.22        | 0.022        | NA                   | NA            | NA           |
| 4        | rs72672233        | 111070319        | <i>PITX2</i>        | 0.11                 | 0–0.23           | 0.048        | NA                   | NA            | NA           |
| 4        | rs297014          | 111082215        | <i>PITX2</i>        | -0.11                | -0.2–0.02        | 0.022        | NA                   | NA            | NA           |
| 4        | rs145701953       | 111416401        | <i>PITX2</i>        | -0.32                | -0.64–0          | 0.048        | NA                   | NA            | NA           |
| 4        | rs13131353        | 112878619        | <i>PITX2</i>        | -0.15                | -0.20–0.02       | 0.020        | NA                   | NA            | NA           |
| 4        | rs10033464        | 110799605        | <i>PITX2</i>        | NA                   | NA               | NA           | 0.22                 | 0.01–0.43     | 0.041        |
| 4        | rs13130446        | 110818000        | <i>PITX2</i>        | NA                   | NA               | NA           | 0.24                 | 0.08–0.39     | 0.003        |
| 4        | rs11098092        | 110877045        | <i>PITX2</i>        | NA                   | NA               | NA           | 0.18                 | 0.03–0.34     | 0.020        |

NA, not available; PV/LA%vol, pulmonary vein to left atrium volume percent ratio; SNP, single nucleotide polymorphism.
